# Supplementary material for: Impact of neoadjuvant chemoradiotherapy (NACRT) vs neoadjuvant chemotherapy (NACT) on anastomotic complications in gastric carcinoma.
Source: Research Square preprint supplement (doi:10.21203/rs.3.rs-6596808/v1), 2025-05-13
Supplement: Supplementary file 1 [file a913350c16b10173ca1a0c33.docx]

**Suppl. Table 1: Univariate logistic regression analysis for risk of overall anastomotic complications**

| **Characteristic** | **Odd’s ratio** | **P-Value** |
| --- | --- | --- |
| **Age** | 0.94 (0.88-1.004) | **0.07** |
| **Gender** | 0.57 (0.08-3.7) | 0.55 |
| **Comorbidities** | 0.28 (0.02-1.69) | 0.16 |
| **Smoking** | 40 (0-NR) | 0.99 |
| **Anaemia** | 0.71(0.12-0.43) | 0.70 |
| **Hypoalbuminemia** | 0.45 (0.03-5.27) | 0.52 |
| **Neoadjuvant therapy type (NACRT vs NACRT)** | 4.54 (0.7-28.6) | **0.10** |
| **Tumor location**   1. Antro-pyloric vs Diffuse 2. GEJ vs Diffuse | -  0.99  1.33 | 0.96  0.99  0.77 |
| **Type of gastrectomy**   1. Distal vs Total 2. Proximal vs Total | -  0.98 (0-NR)  0.50 (0.07-3.5) | 0.78  0.99  0.48 |
| **Type of reconstruction**   1. RYEJ vs Billroth II 2. RYGJ vs Billroth II 3. EGA vs Billroth II | -  0.00 (0-NR)  0.00 (0-NR)  0.78 (0.11-5.49) | 0.99  0.99  0.99  0.80 |
| **Technique of Anastomosis**  (Handsewn vs Stapled) | 0.25(0.04-1.56) | 0.19 |
| **Combined organ resection** (No vs Yes) | 0.32 (0.04-2.25) | 0.25 |
| **Histopathology** (non-signet vs signet ring) | 1.20 (0.12-12.04) | 0.87 |
| **Pathological T-stage (T3/4 vsT1/2)** | 1.71 (1.12-2.4) | 0.57 |
| **Pathological N-stage (positive vs negative)** | 1.13(0.18-7.70) | 0.89 |
| **Margin status** (Positive vs negative) | 2.20(0.19-2.50) | 0.52 |
| **Adjuvant therapy** (yes vs no) | 0.18(0.02-1.431.) | **0.10** |

GEJ-Gastroesophageal junction; RYEJ-Roux-en-Y-esophagojejunostomy; RYGJ-Roux-en-Y-gastrojejunostomy; EGA-Esophagogastric anastomosis.
